# Supplementary material for: Prognostic Value of Aortic Valve Area by Doppler Echocardiography in Patients With Severe Asymptomatic Aortic Stenosis
Source: PubMed Central journal article supplement — J Am Heart Assoc. 2016 May 3;5(5):e003146. doi: 10.1161/JAHA.115.003146 (PMC4889185; doi:10.1161/jaha.115.003146), 2016-05-03
Supplement: JAH3-5-e003146-s001.pdf [file JAH3-5-e003146-s001.pdf]

## **SUPPLEMENTAL MATERIAL**

|                                                | Severe AS (AVA≤1.0 cm <sup>2</sup> ) | Mild to moderate AS | P-value |
|------------------------------------------------|--------------------------------------|---------------------|---------|
| <b>Number of patients</b>                      | <b>199</b>                           | <b>90</b>           |         |
| <b>Demographic and baseline data</b>           |                                      |                     |         |
| Age (y)                                        | 69 ± 14                              | 67 ± 13             | 0.15    |
| Male                                           | 110 (55)                             | 67 (74)             | 0.002   |
| BMI (kg/m <sup>2</sup> )                       | 26 [23-30]                           | 26 [24-30]          | 0.50    |
| SBP (mmHg)                                     | 130 [120-150]                        | 140 [130-150]       | 0.06    |
| DBP (mmHg)                                     | 71 [69-80]                           | 73 [70-80]          | 0.87    |
| <b>Medical history and risk factors</b>        |                                      |                     |         |
| Diabetes mellitus                              | 54 (27)                              | 29 (32)             | 0.38    |
| Dyslipidemia                                   | 87 (44)                              | 41 (46)             | 0.77    |
| Smoking                                        | 57 (29)                              | 23 (26)             | 0.59    |
| Hypertension                                   | 118 (59)                             | 67 (74)             | 0.013   |
| Coronary artery disease                        | 75 (38)                              | 33 (37)             | 0.87    |
| History of atrial fibrillation                 | 45 (23)                              | 13 (14)             | 0.11    |
| Charlson comorbidity index                     | 1 [1-2]                              | 2 [1-3]             | 0.36    |
| <b>Aortic valve</b>                            |                                      |                     |         |
| AVA (cm <sup>2</sup> )                         | 0.79 [0.65-0.90]                     | 1.27 [1.13-1.37]    | <0.0001 |
| Indexed AVA (cm <sup>2</sup> /m <sup>2</sup> ) | 0.40 [0.33-0.47]                     | 0.65 [0.57-0.73]    | <0.0001 |
| MPG (mmHg)                                     | 45 [36-56]                           | 22 [18-31]          | <0.0001 |
| Vmax (m/s)                                     | 4.2 [3.7-4.7]                        | 3.04 [2.80-3.54]    | <0.0001 |
| Aortic VTI (cm)                                | 100 [81-119]                         | 69 [59-82]          | <0.0001 |
| Valvuloarterial impedance                      | 4.6 [3.8-5.7]                        | 3.6 [3.2-4.4]       | <0.0001 |
| Stroke volume index (mL)                       | 38 [31-46]                           | 45 [38-50]          | <0.0001 |
| <b>LV function</b>                             |                                      |                     |         |
| LVEF (%)                                       | 65 [58-71]                           | 65 [60-69]          | 0.91    |
| LV Mass index (g/m <sup>2</sup> )              | 107 [87-133]                         | 109 [91-138]        | 0.38    |
| <b>Others</b>                                  |                                      |                     |         |
| LA area (cm <sup>2</sup> )                     | 23±7                                 | 22±7                | 0.15    |
| sPAP (mmHg)                                    | 30 [23-37]                           | 30 [27-35]          | 0.72    |

**Table S1:** Baseline Demographic, Clinical and Echocardiographic Parameters of the group of Patients with Mild to Moderate AS ( $1.0 < AVA \leq 1.5 \text{ cm}^2$ ) compared with patients with severe Aortic Stenosis ( $AVA \leq 1.0 \text{ cm}^2$ ). AS Aortic Stenosis, LV left ventricle, AVA aortic valve area, MPG mean pressure gradient, VTI velocity time integral, LVEF left ventricular ejection fraction, LA left atrium, sPAP systolic pulmonary arterial pressure
